# Supplementary material for: Muscone/RI7217 co-modified upward messenger DTX liposomes enhanced permeability of blood-brain barrier and targeting glioma
Source: PubMed Central journal article supplement (PMC7150489; doi:10.7150/thno.41322), 2020-03-04
Supplement: thnov10p4308s1.pdf [file thnov10p4308s1.pdf]

## Supporting Information

### Muscone/RI7217 co-modified upward messenger DTX liposomes enhanced permeability of blood–brain barrier and targeting glioma

Shuangming Kang<sup>1\*</sup>, Wenjuan Duan<sup>2\*</sup>, Shangqian Zhang<sup>2</sup>, Dawei Chen<sup>1</sup><sup>✉</sup>, Jianfang Feng<sup>3</sup><sup>✉</sup>,  
Na Qi<sup>2</sup><sup>✉</sup>

1 Department of Pharmaceutics, Shenyang Pharmaceutical University, Shenyang, 110016, China;

2 Department of Pharmacy, Guilin Medical University, Guilin, 541004, China;

3 Department of Pharmacy, Guangxi University of Chinese Medicine, Nanning, 530299, China;

\*These authors contribute equally to this work.

✉ Corresponding author : Tel/Fax: +86-773-5891498, E-mail: qina1012@glmc.edu.cn (Na Qi), fengjianfang@vip.163.com (Jianfang Feng), chendawei@syphu.edu.cn (Dawei Chen).

| Supporting Information Figure of Contents                                                                                                                                                                                  | Page       |
|----------------------------------------------------------------------------------------------------------------------------------------------------------------------------------------------------------------------------|------------|
| <b>Figure.S1</b> (A) Chemical diagram of Muscone and DSPE-PEG <sub>2000</sub> -NHS.<br>(B) Flight Mass Spectrum of DSPE-PEG <sub>2000</sub> -Muscone. (C) <sup>1</sup> H NMR spectrum of DSPE-PEG <sub>2000</sub> -Muscone | <b>S-2</b> |

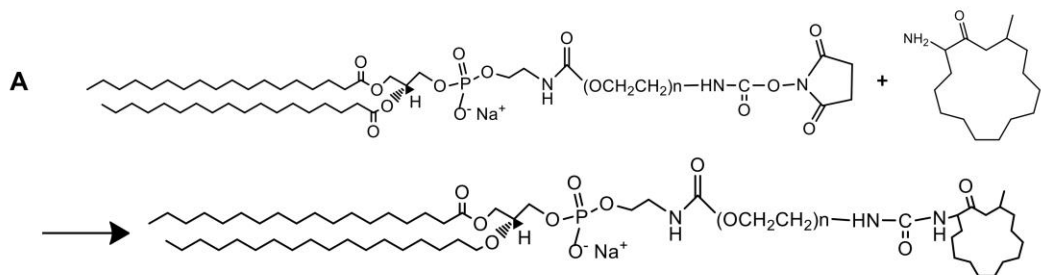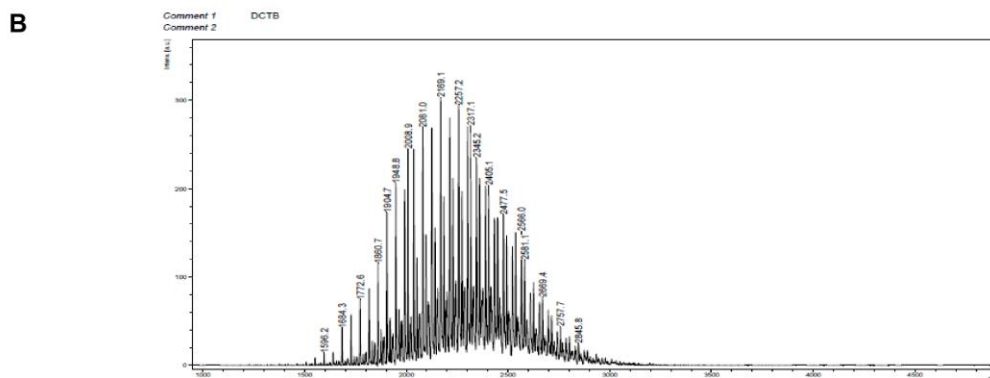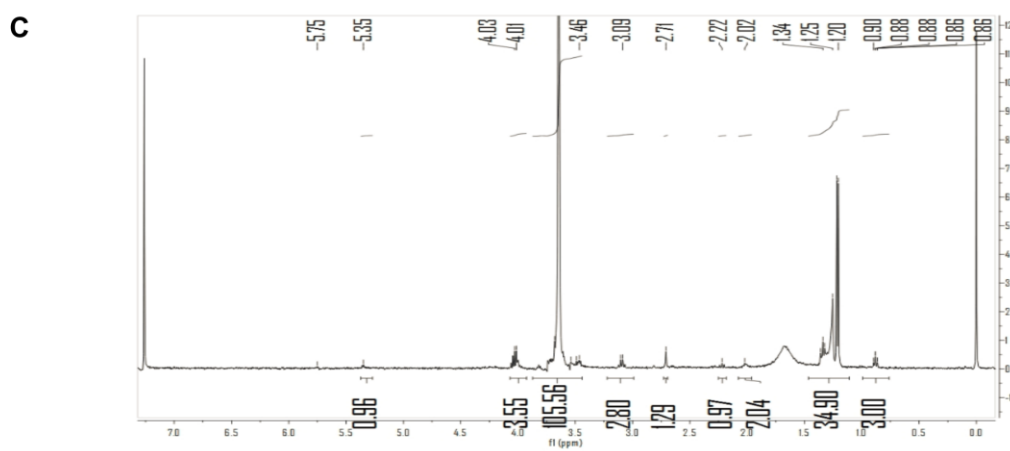

**Figure.S1** (A) Chemical diagram of Muscone and DSPE-PEG<sub>2000</sub>-NHS. (B) Flight Mass Spectrum of DSPE-PEG<sub>2000</sub>-Muscone. (C) <sup>1</sup>H NMR spectrum of DSPE-PEG<sub>2000</sub>-Muscone
